# Supplementary material for: Improved Influenza Diagnostics through Thermal Contrast Amplification
Source: MDPI journal article supplement (doi:10.3390/diagnostics11030462), 2021-03-07
Supplement: s1 [file s1]

## Supporting Information

|                |                |
|----------------|----------------|
| True positive  | False positive |
| False negative | True negative  |

  
$$\text{Sensitivity} = \frac{\text{True positive}}{\text{True positive} + \text{False negative}}$$
$$\text{Specificity} = \frac{\text{True negative}}{\text{False positive} + \text{True negative}}$$

**Figure S1.** Relationship between sensitivity and specificity with the classifications from the statistical 2×2 matrix.

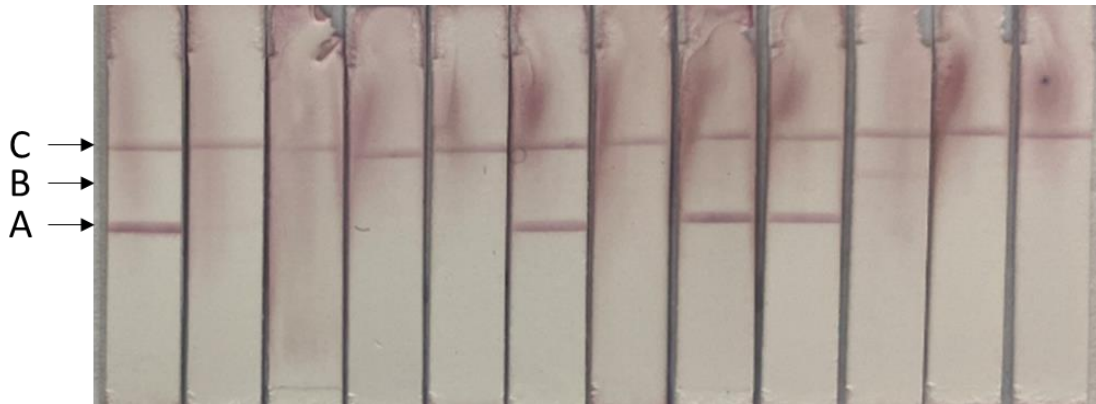

**Figure S2.** Strong background staining occurred when testing some nasopharyngeal wash samples using BD Veritor™ rapid influenza diagnostic tests (RIDTs). The positions of the control line and test lines for influenza A and B are marked by arrows. C: control line; B: influenza B; A: influenza A.
